# Supplementary material for: Standardized Ultrasound Hepatic/Renal Ratio and Hepatic Attenuation Rate to Quantify Liver Fat Content: An Improvement Method
Source: PubMed Central journal article supplement — Obesity (Silver Spring). 2011 Oct 20;20(2):444–52. doi: 10.1038/oby.2011.302 (PMC3270296; doi:10.1038/oby.2011.302), 2011-10-20
Supplement: oby2011302x1.pdf [file oby2011302x1.pdf]

**A**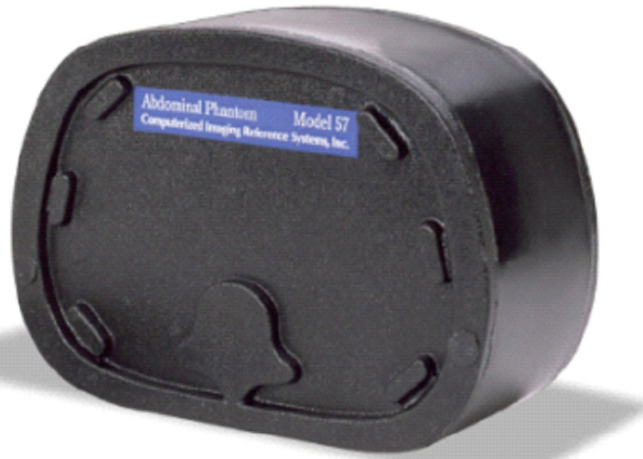**B**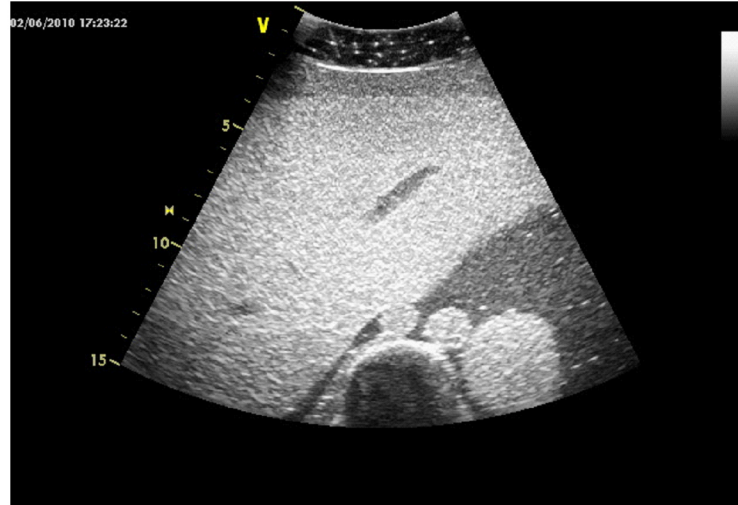**C**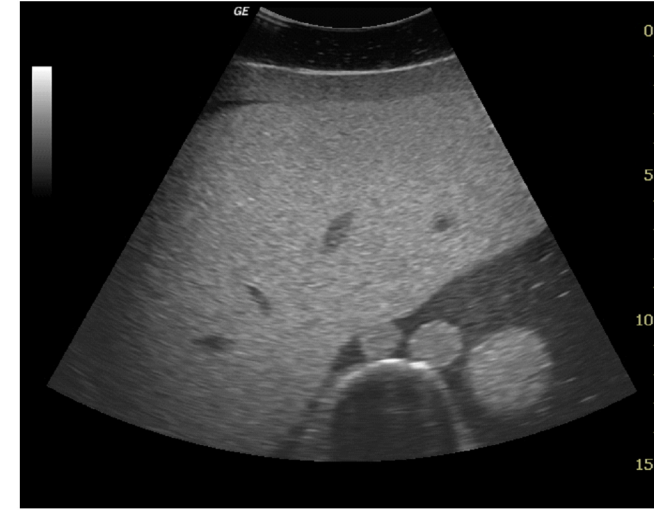**D**

ICC:0.985(0.768-0.999)

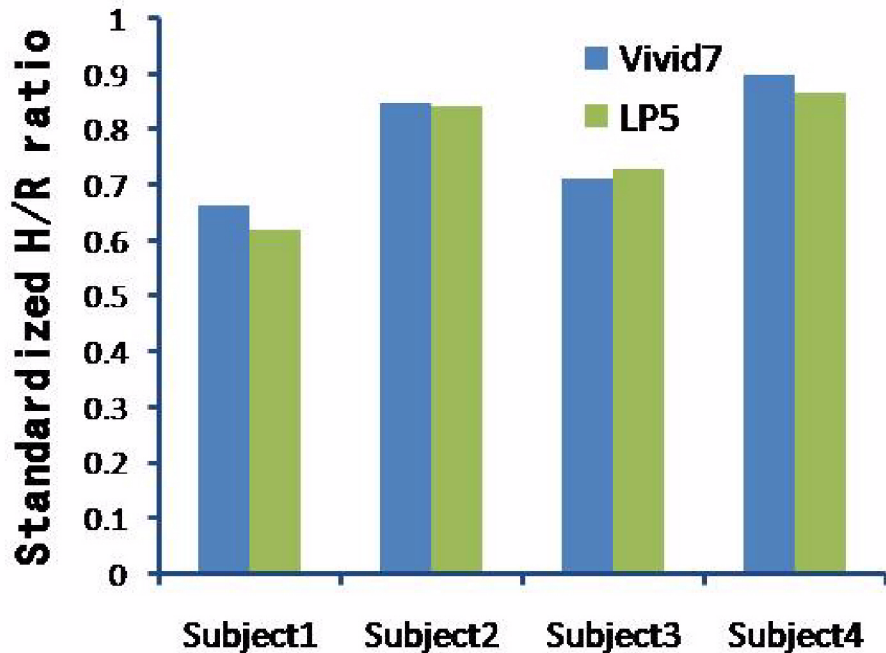**E**

ICC:0.957(0.337-0.997)

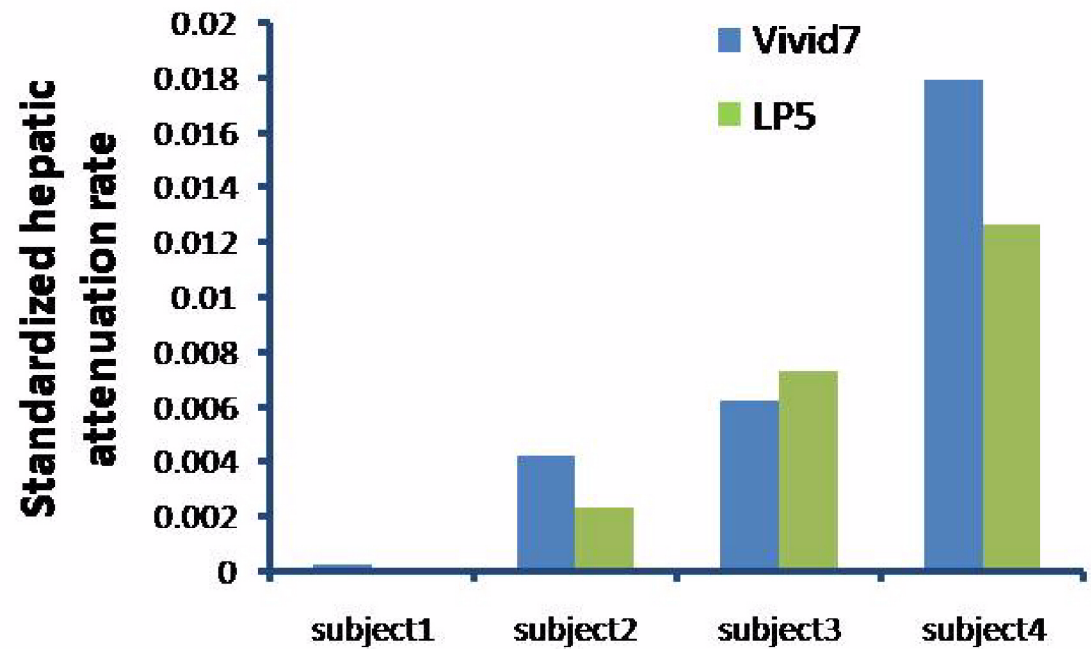

Supplement 1: A, Photograph of the tissue-mimicking phantom; B, ultrasound image of the phantom under Vivid 7 ultrasound machine; C, Ultrasound image of the phantom under LP5 ultrasound machine; D,E, Agreement of standardized H/R ratio and hepatic attenuation rate in four patients. ICC=0.985 and 0.957, respectively.
