# Supplementary figures and images for: Standardized Ultrasound Hepatic/Renal Ratio and Hepatic Attenuation Rate to Quantify Liver Fat Content: An Improvement Method
Source: PubMed Central journal article supplement — Obesity (Silver Spring). 2011 Oct 20;20(2):444–52. doi: 10.1038/oby.2011.302 (PMC3270296; doi:10.1038/oby.2011.302), 2011-10-20

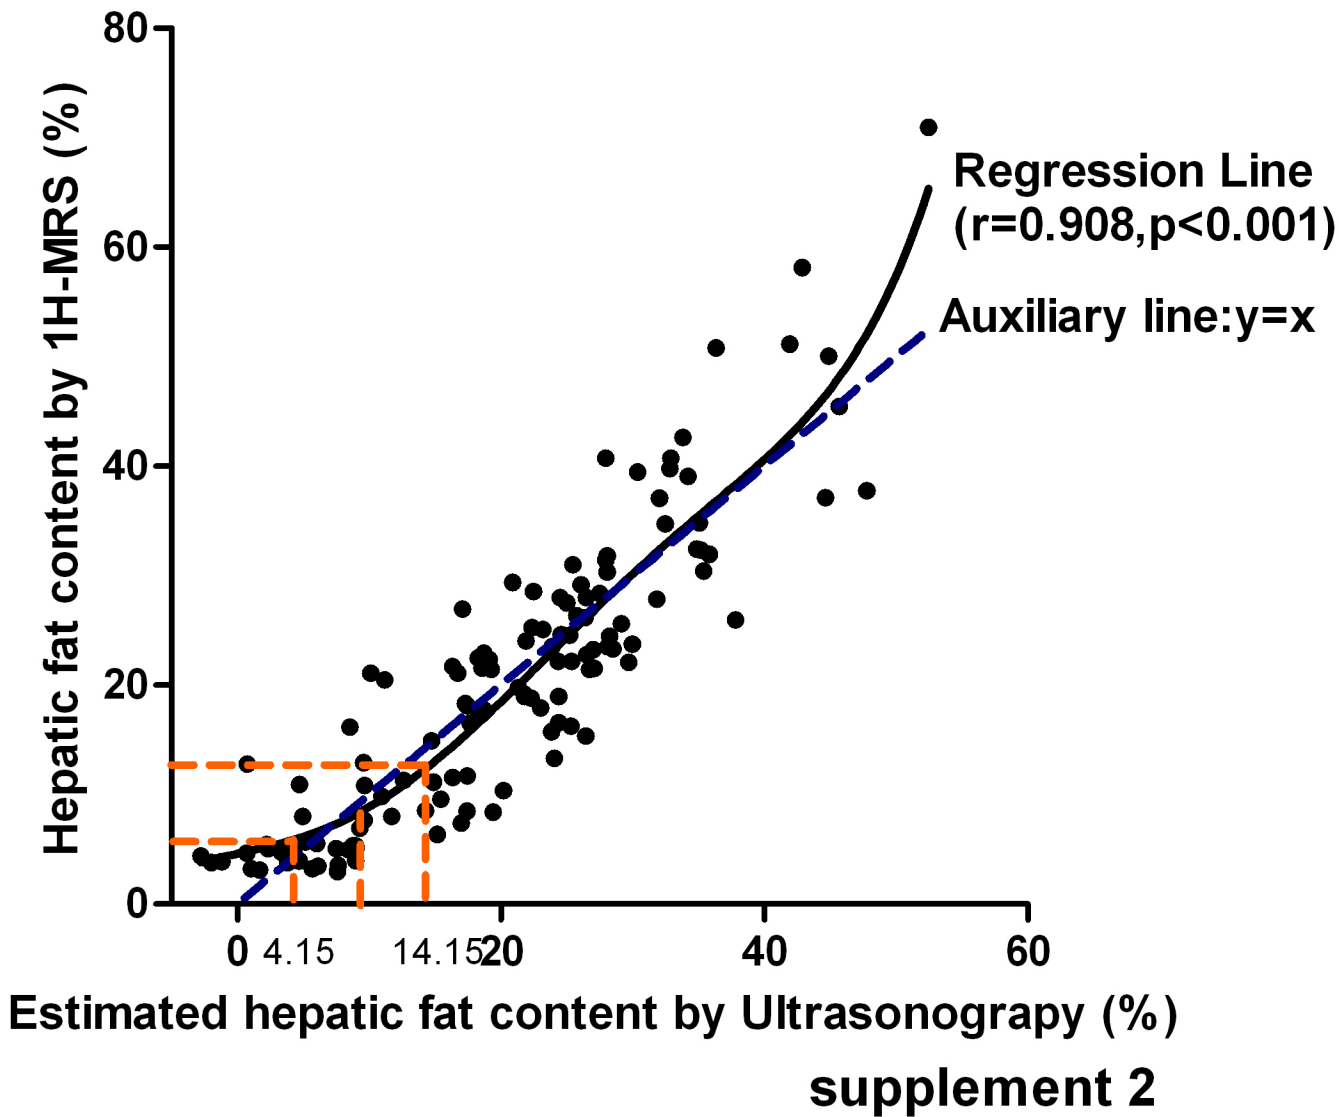

Supplement: oby2011302x2.pdf [file oby2011302x2.pdf]
